# Supplementary material for: Isoindoline nitroxide-labeled porphyrins as potential fluorescence-suppressed spin probes
Source: Royal Society of Chemistry journal article supplement (doi:10.1039/c6ob02748b), 2017-01-01
Supplement: c6ob02748b1.pdf [file c6ob02748b1.pdf]

## Supporting information:

### 5,10,15,20-tetraphenylporphyrin (**4**, TPP, Band 1):

#### MS:

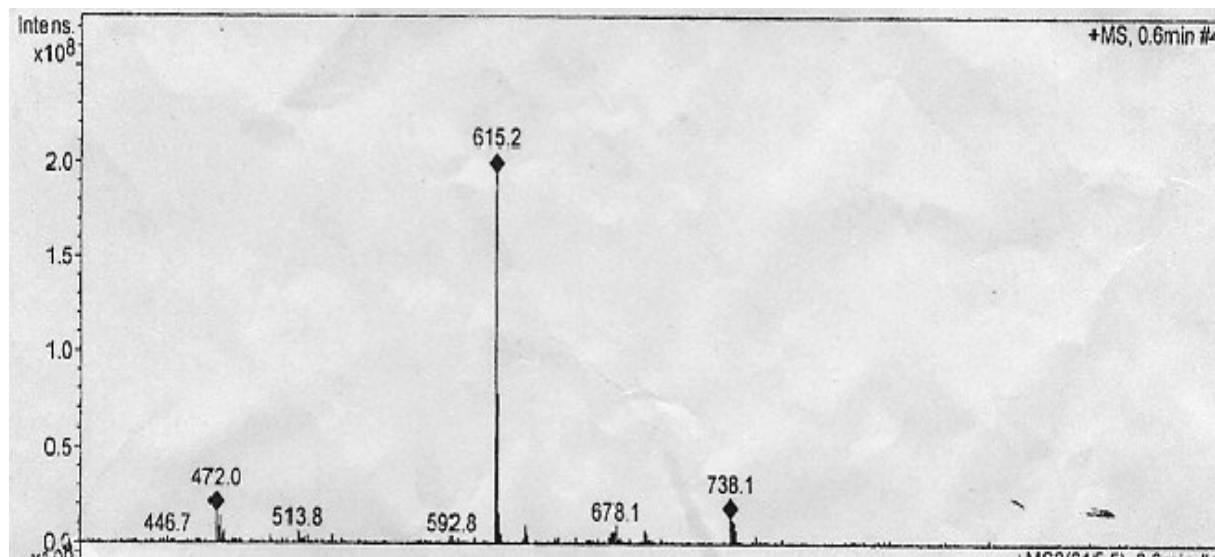

Figure EI MS spectrum of TPP

#### <sup>1</sup>H NMR:

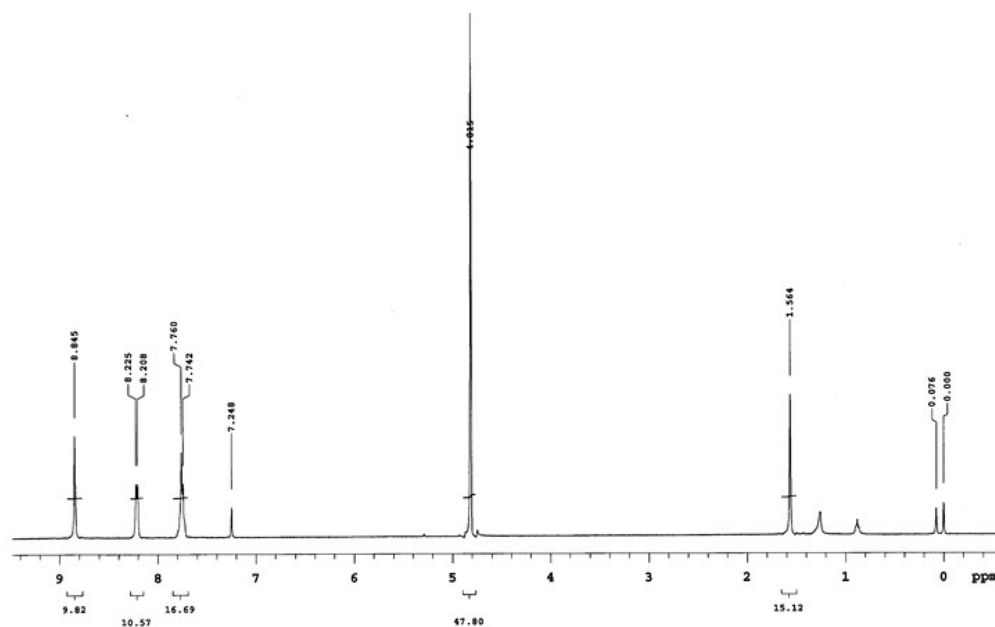

Figure <sup>1</sup>H NMR spectrum of TPP

## 5-(4'-carboethoxymethyleneoxyphenyl)-10,15,20-trisphenylporphyrin (5, CEPTPP, Band 2):

### MS:

zou\_111123141502 #5-22 RT: 0.03-0.15 AV: 18 NL: 1.38E7  
T: ITMS + c ESI: sid=35.00 Full ms [155.00-1500.00]

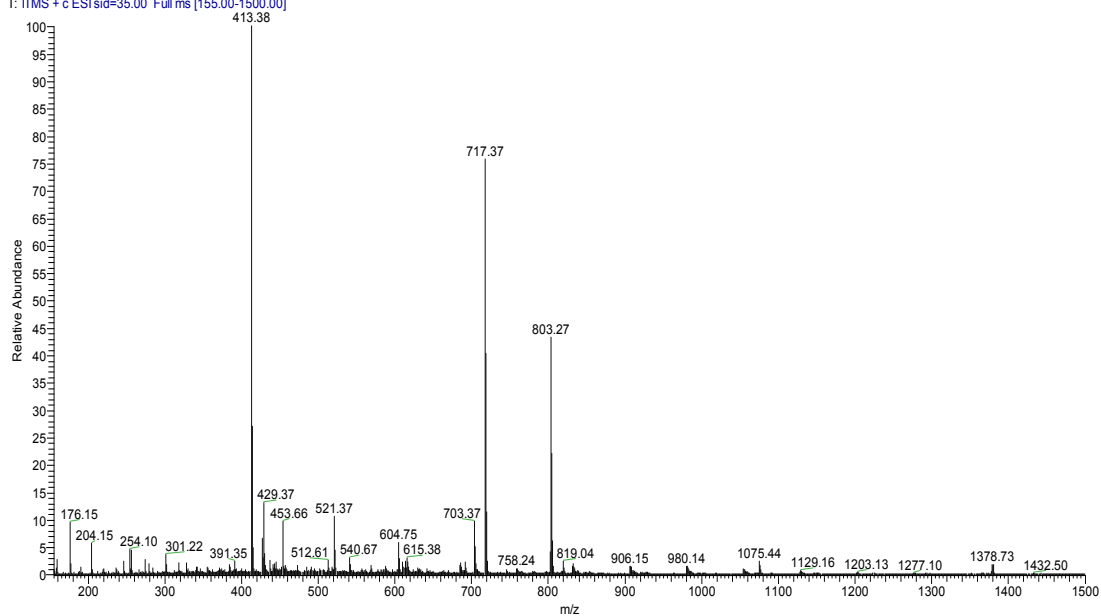

Figure EI MS spectrum of CEPTPP

### IR:

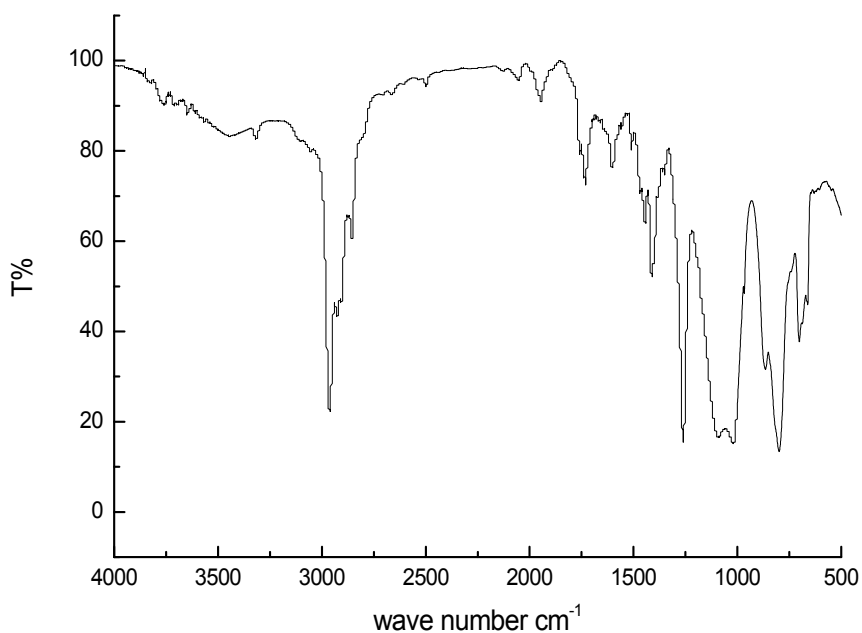

Figure FT-IR spectrum of CEPTPP

UV:

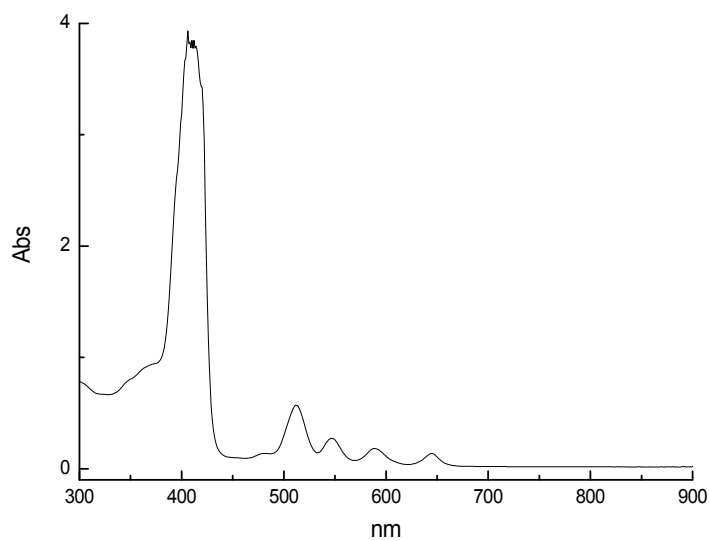

Figure UV-Vis spectrum of CEPTTP

**5-(1',1',3',3'-tetramethylisoindolin-2'-yloxy-5'-yl)-10,15,20-trisphenylporphyrin (6, T<sub>MIO</sub>TPP, Band 3):**

MS:

zou\_111123142948 #8-45 RT: 0.06-0.38 AV: 38 NL: 7.59E6  
T: ITMS + c ESI!sid=35.00 Full ms [220.00-2000.00]

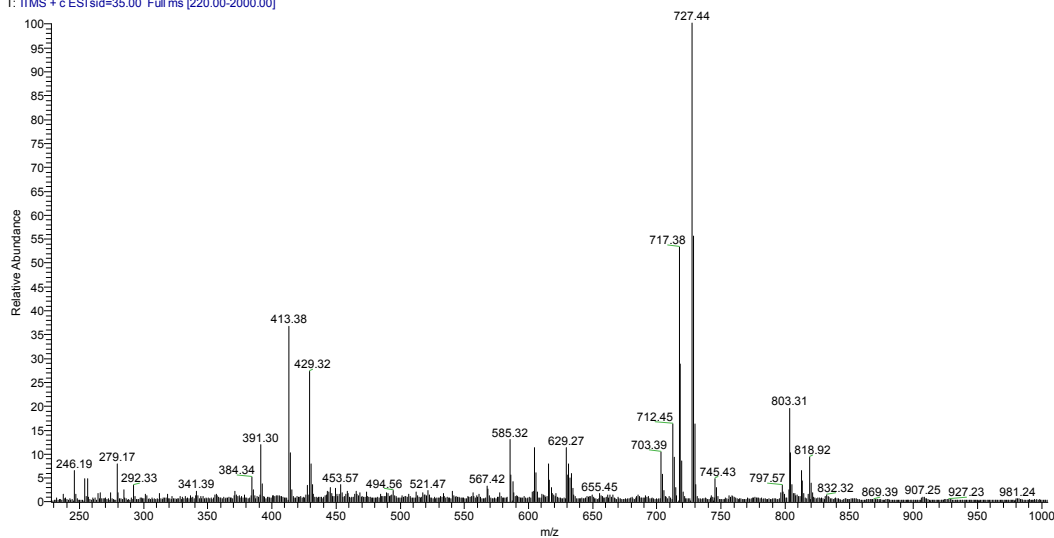

Figure EI MS spectrum of T<sub>MIO</sub>TPP

IR:

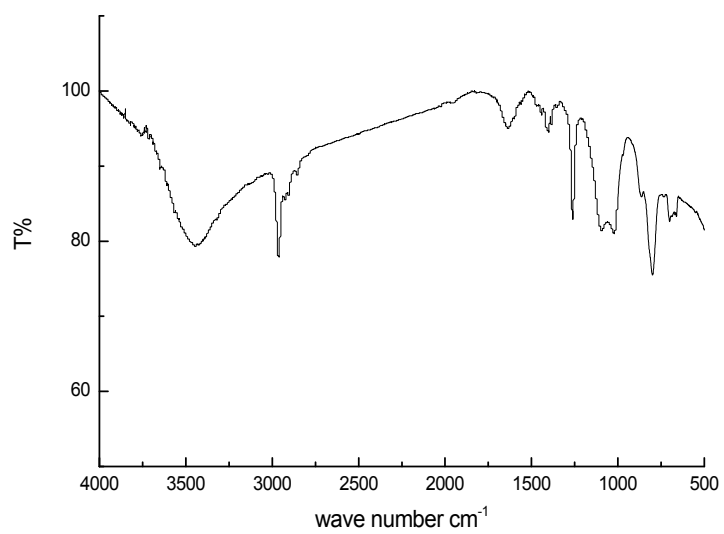

**Figure FT-IR spectrum of T<sub>MIO</sub>TPP**

**UV:**

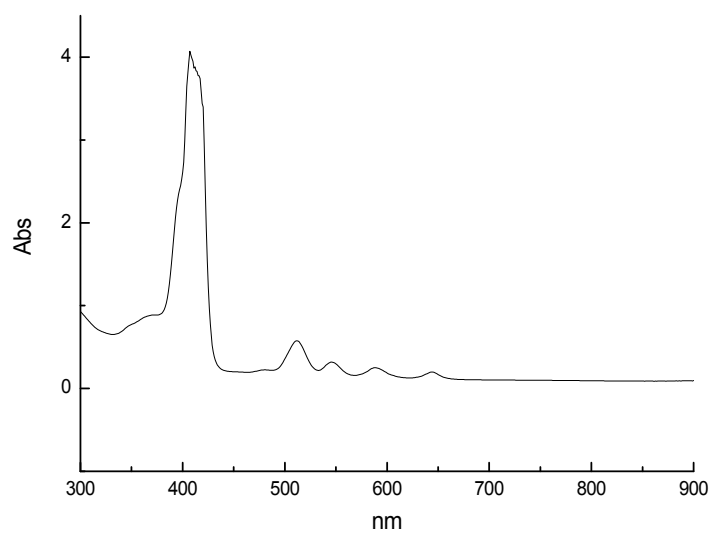

**Figure UV-Vis spectrum of T<sub>MIO</sub>TPP**

**<sup>1</sup>H NMR:**

单晶样品 2012.5.11. DMSO

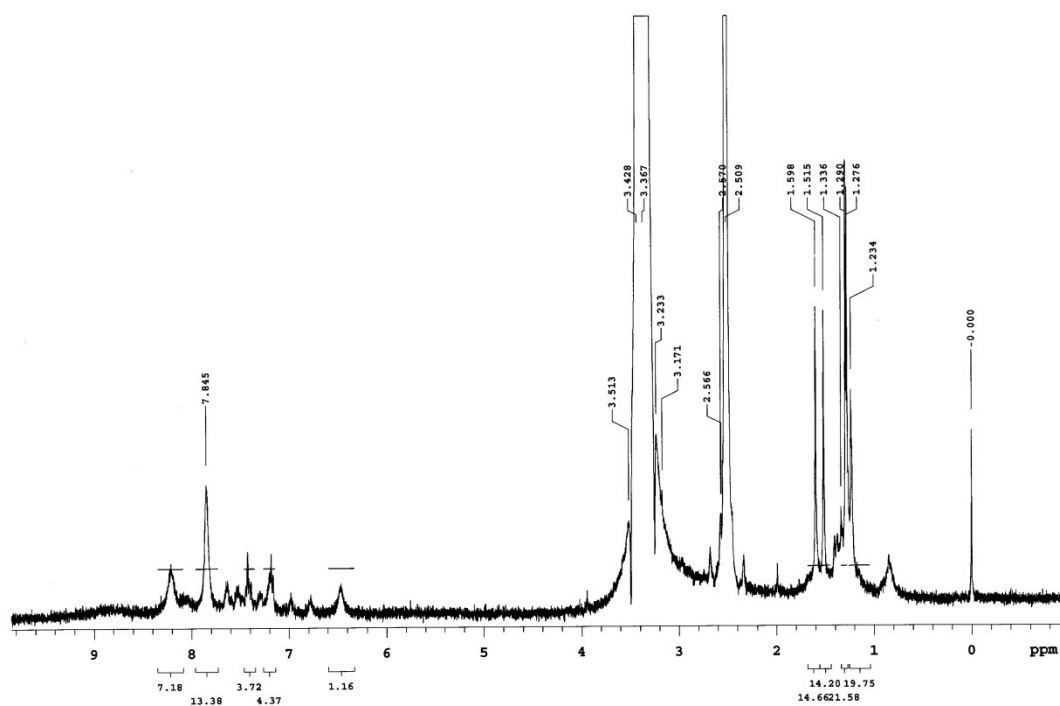

Figure  $^1\text{H}$  NMR spectrum of  $T_{\text{MIO}}\text{TPP}$

**5,15-bis(4'-carboethoxymethyleneoxyphenyl)-10,20-bisphenylporphyrin  
(7, BCEPBPP, Band 4):**

**MS:**

20120409\_120409123512 #153-270 RT: 1.36-2.36 AV: 118 NL: 1.62E6  
T: ITMS + c ESI Full ms [300.00-2000.00]

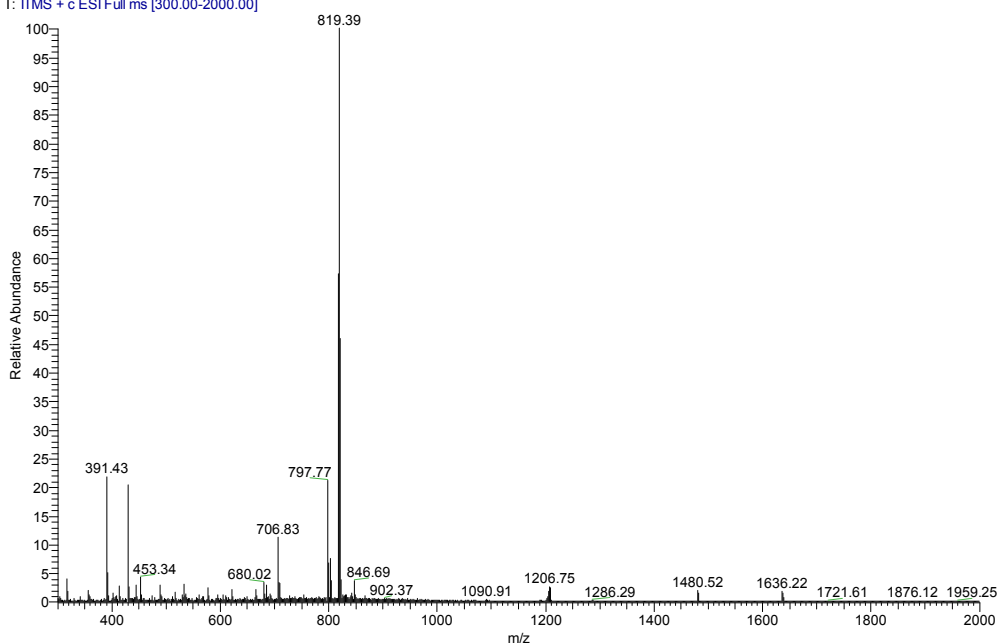

Figure EI MS spectrum of BCEPBPP

**IR:**

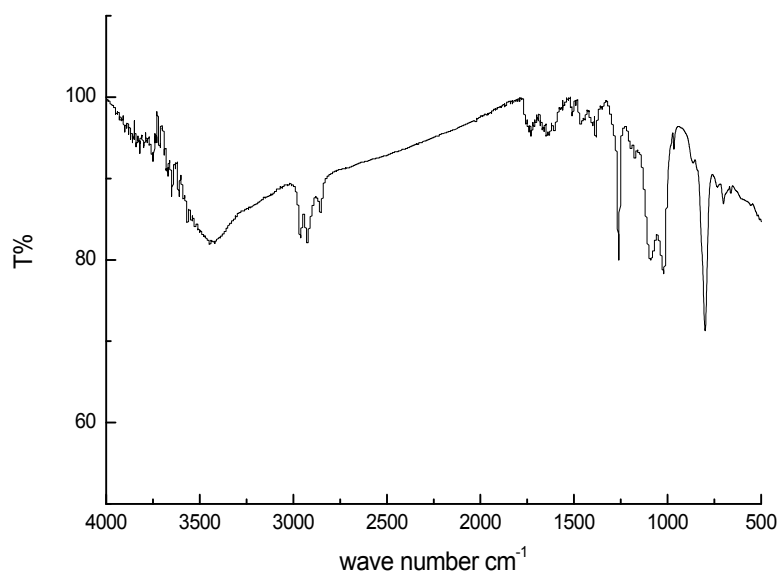

**Figure FT-IR spectrum of BCEPBPP**

**UV:**

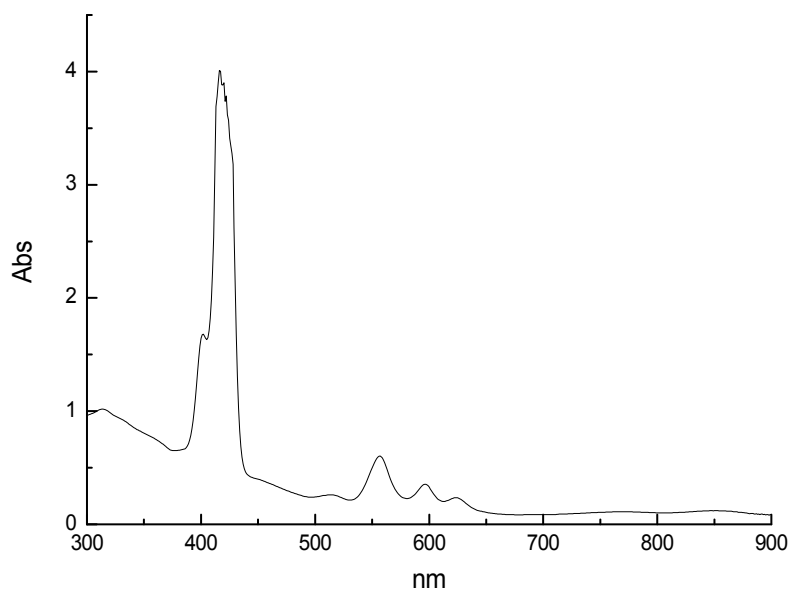

**Figure UV-Vis spectrum of BCEPBPP**

**<sup>1</sup>H NMR:**

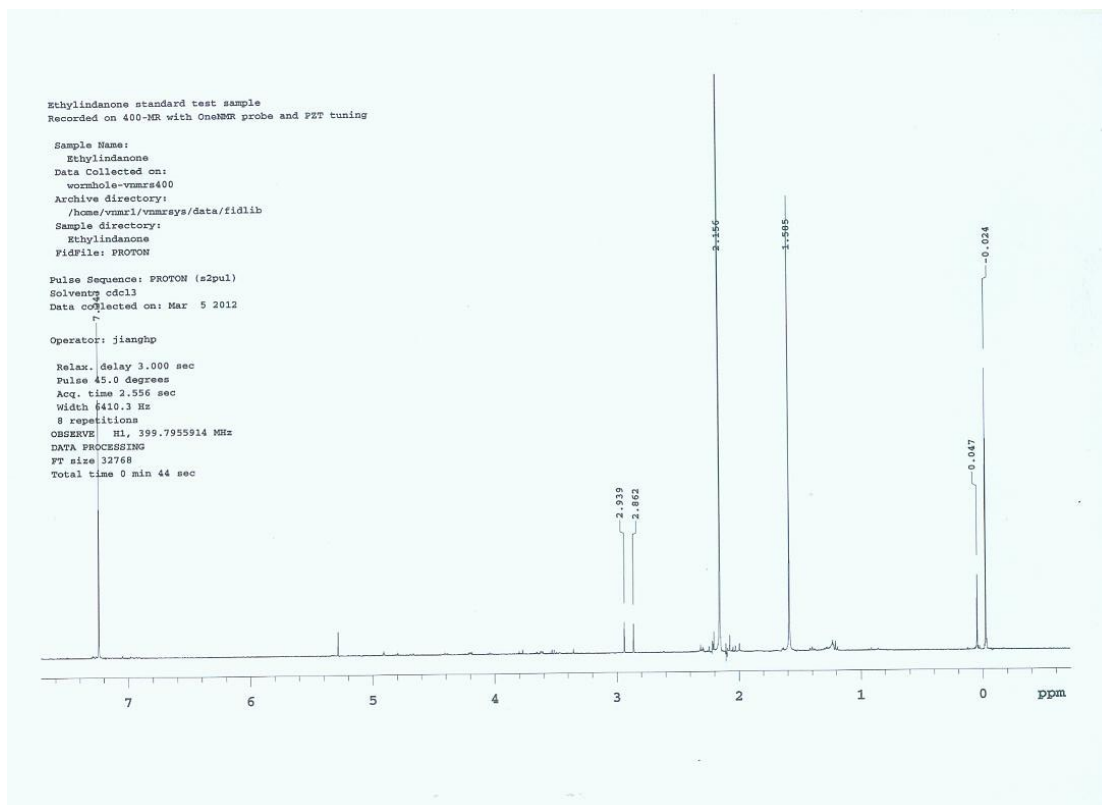

Figure 1H NMR spectrum of BCEPBPP

**5-(1',1',3',3'-tetramethylisoindolin-2'-yloxy-5'-yl)-15-(4''-carboethoxymethyleneoxyphenyl)-10,20-bisphenylporphyrin**

**(8,**

**T<sub>MIO</sub>CEPBPP, Band 5):**

**MS:**

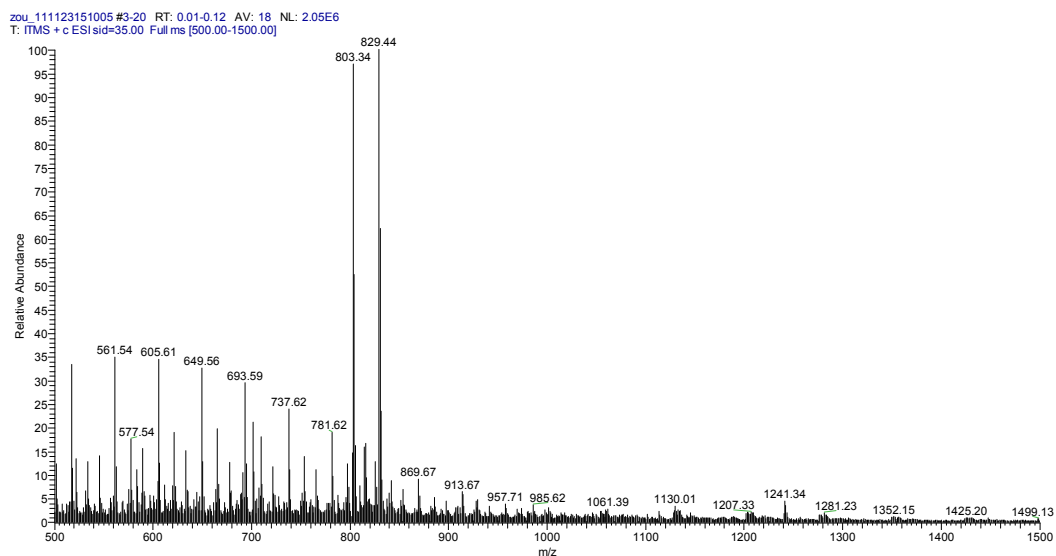

Figure EI MS spectrum of T<sub>MIO</sub>CEPBPP

**UV:**

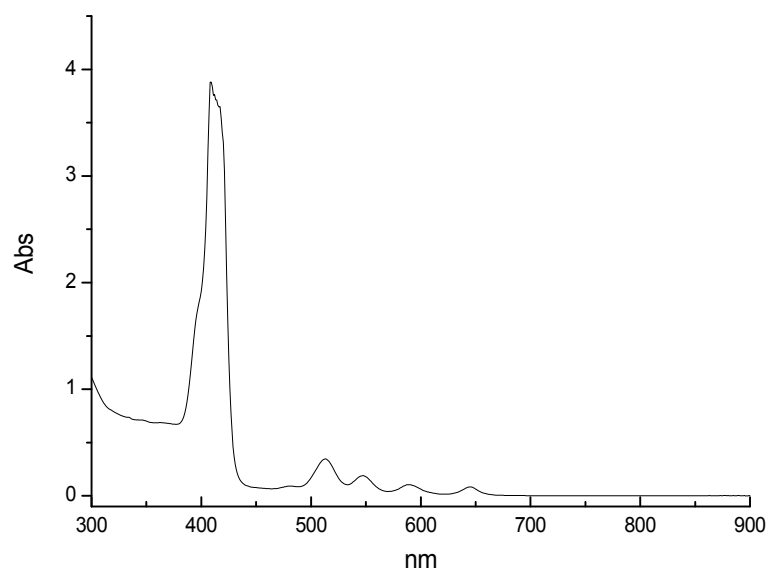

Figure UV-Vis spectrum of T<sub>MIO</sub>CEPBPP

IR:

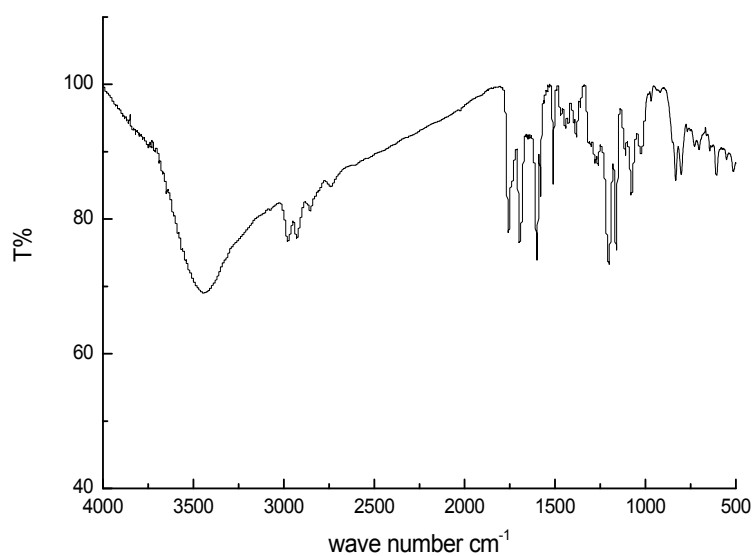

Figure FT-IR spectrum of T<sub>MIO</sub>CEPBPP

**5-(1',1',3',3'-tetramethylisoindolin-2'-yloxy-5'-yl)-10,20-bis(4''-carboethoxy-methyleneoxyphenyl)-15-phenylporphyrin (9, T<sub>MIO</sub>BCEPPP, Band 6):**

**MS:**



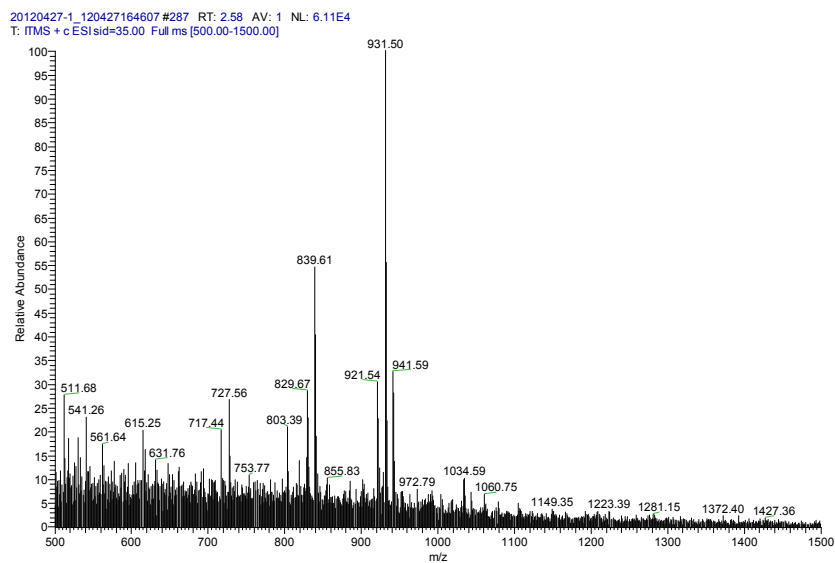

**Figure** EI MS spectrum of T<sub>MIO</sub>BCEPPP

**UV:**

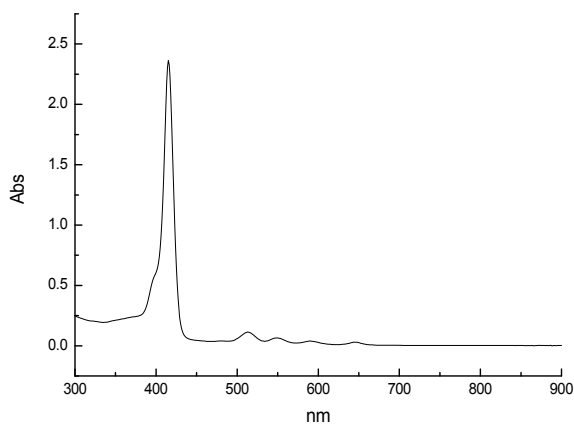

**Figure** UV-Vis spectrum of T<sub>MIO</sub>BCEPPP

**IR:**

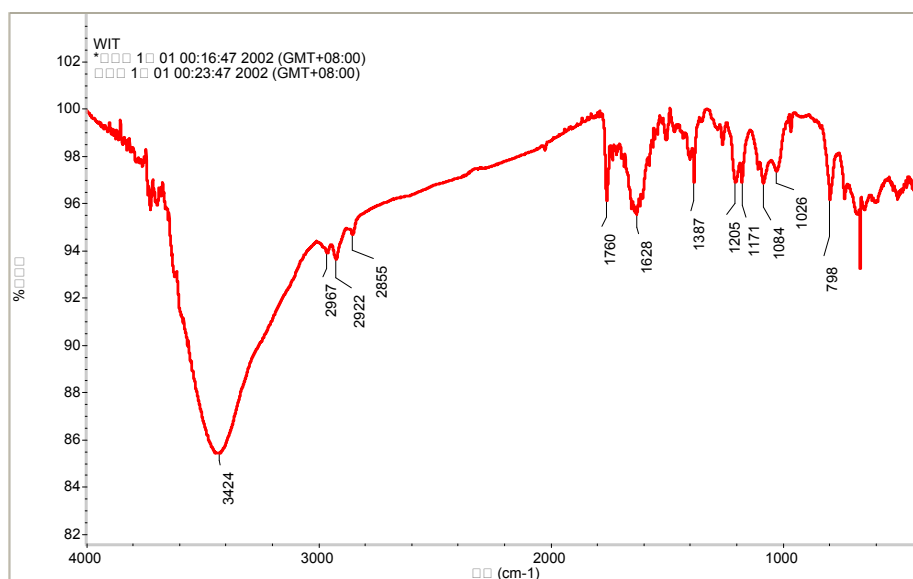

Figure FT-IR spectrum of T<sub>MIO</sub>BCEPPP

<sup>1</sup>H NMR:

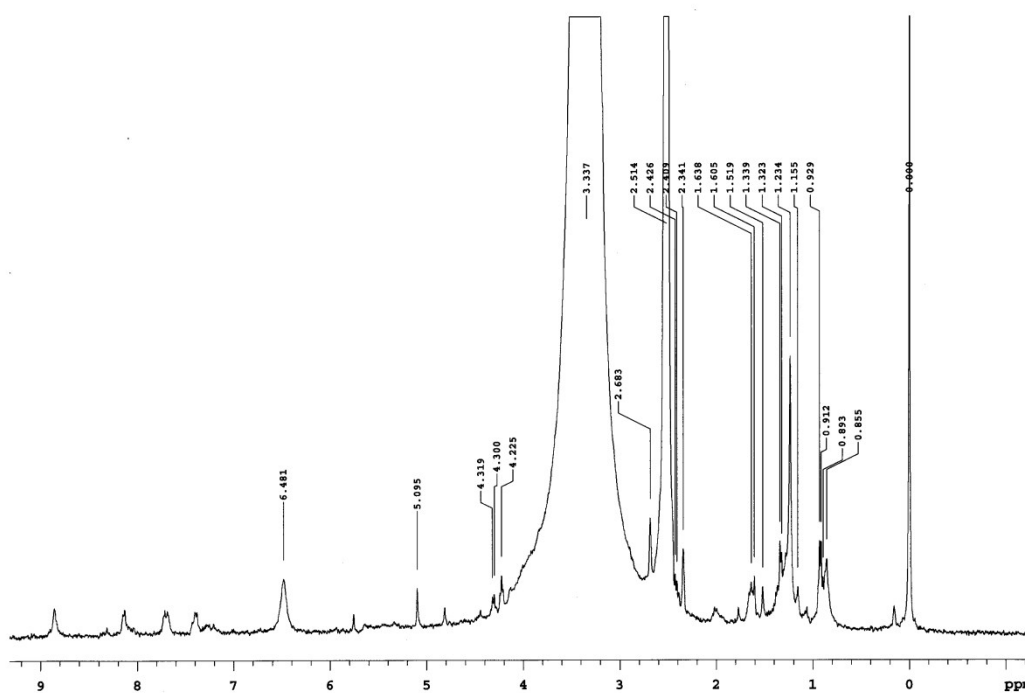

Figure <sup>1</sup>H NMR spectrum of T<sub>MIO</sub>BCEPPP

5,15-bis(1',1',3',3'-tetramethylisoindolin-2'-yloxy-5'-yl)-10-(4''-carboethoxymethylene-oxyphenyl)-20-phenylporphyrin  
BT<sub>MIO</sub>CEPPP, Band 7):

MS:

(10,

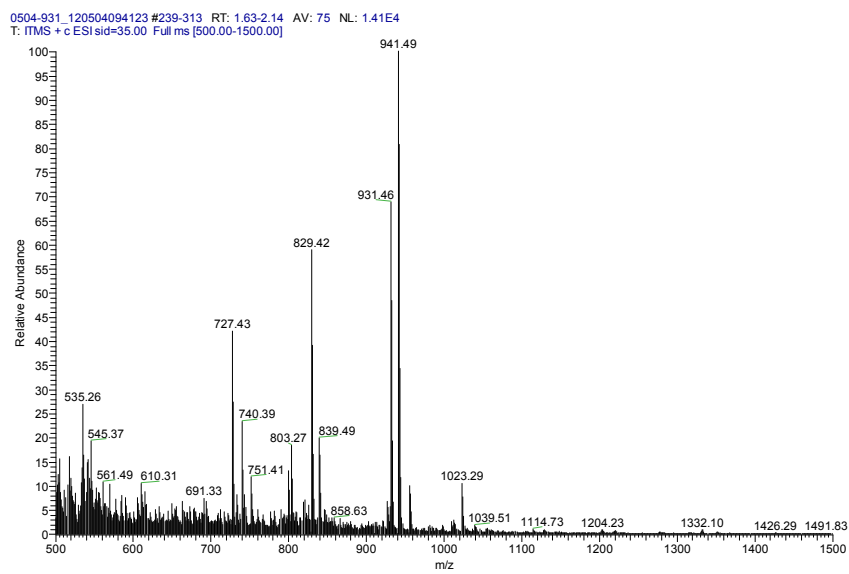

**Figure EI MS spectrum of BT<sub>MIO</sub>CEPPP**

**UV:**

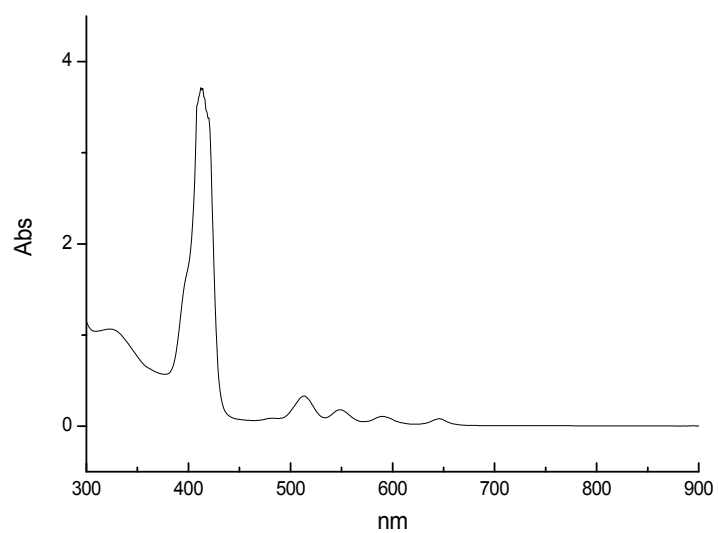

**Figure UV-Vis spectrum of BT<sub>MIO</sub>CEPPP**

**IR:**

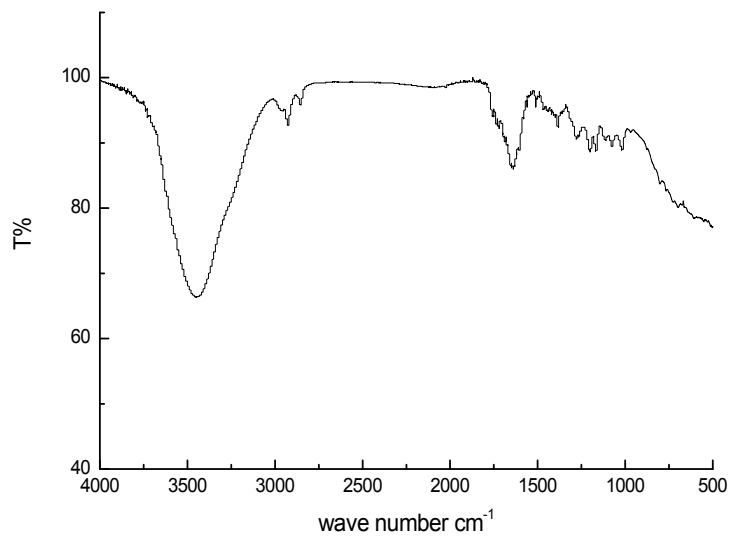

Figure FT-IR spectrum of BT<sub>MIO</sub>CEPPP

5,10,15,20-tetra(4'-carboethoxymethyleneoxyphenyl)-porphyrin (11,  
TCEPP, Band 8):

MS:

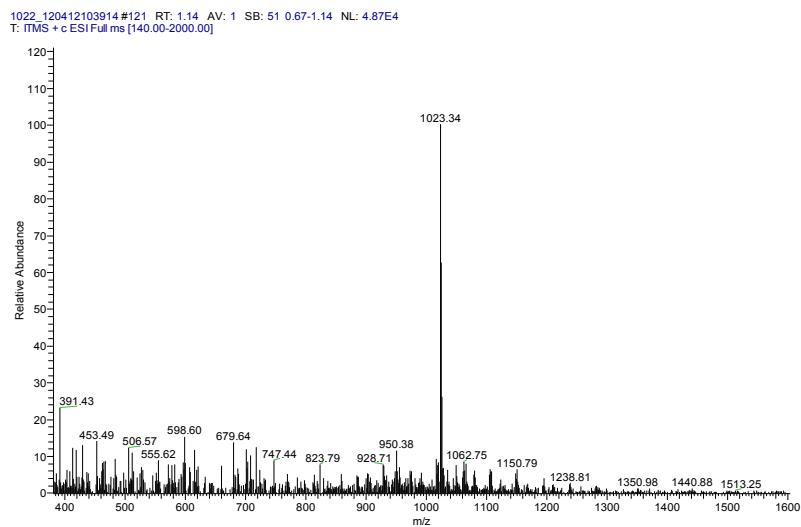

Figure EI MS spectrum of TCEPP

IR:

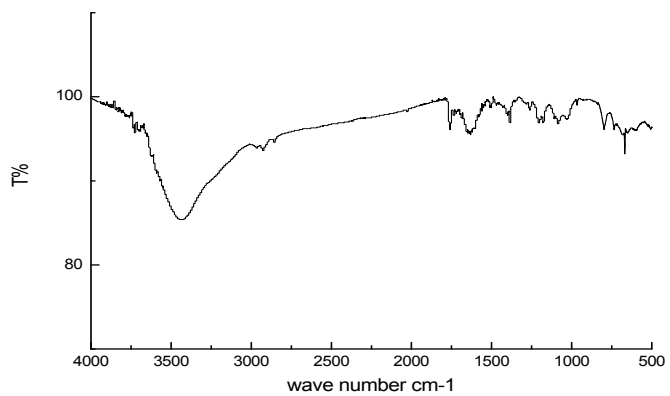

**Figure** FT-IR spectrum of TCEPP

**UV:**

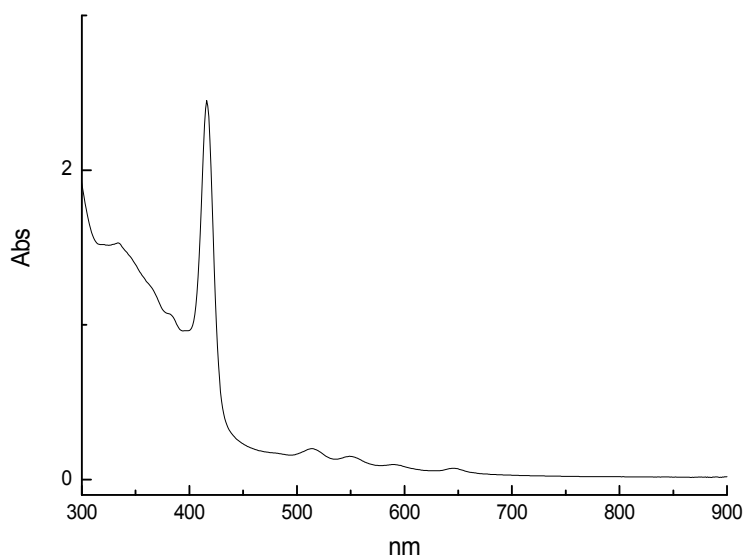

**Figure** UV-Vis spectrum of TCEPP

**<sup>1</sup>H NMR:**

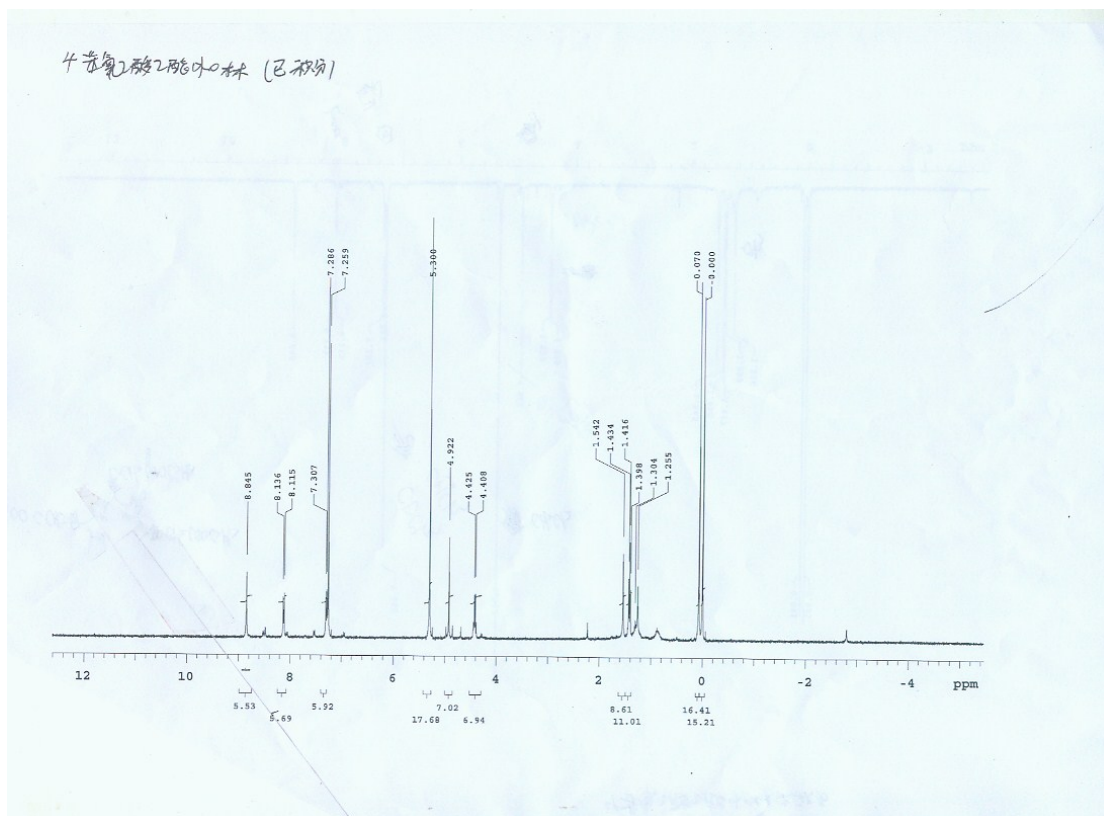

Figure 1<sup>H</sup> NMR spectrum of TCEPP

Electrochemical experiments:

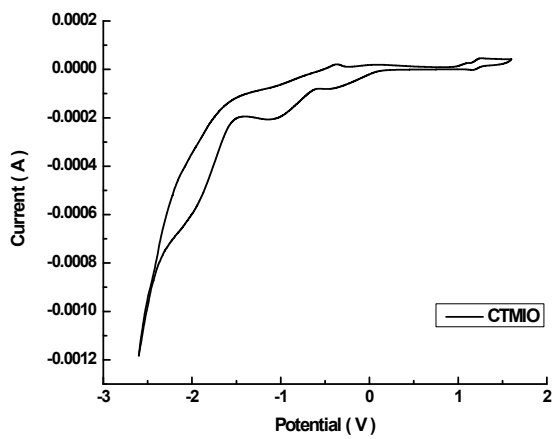

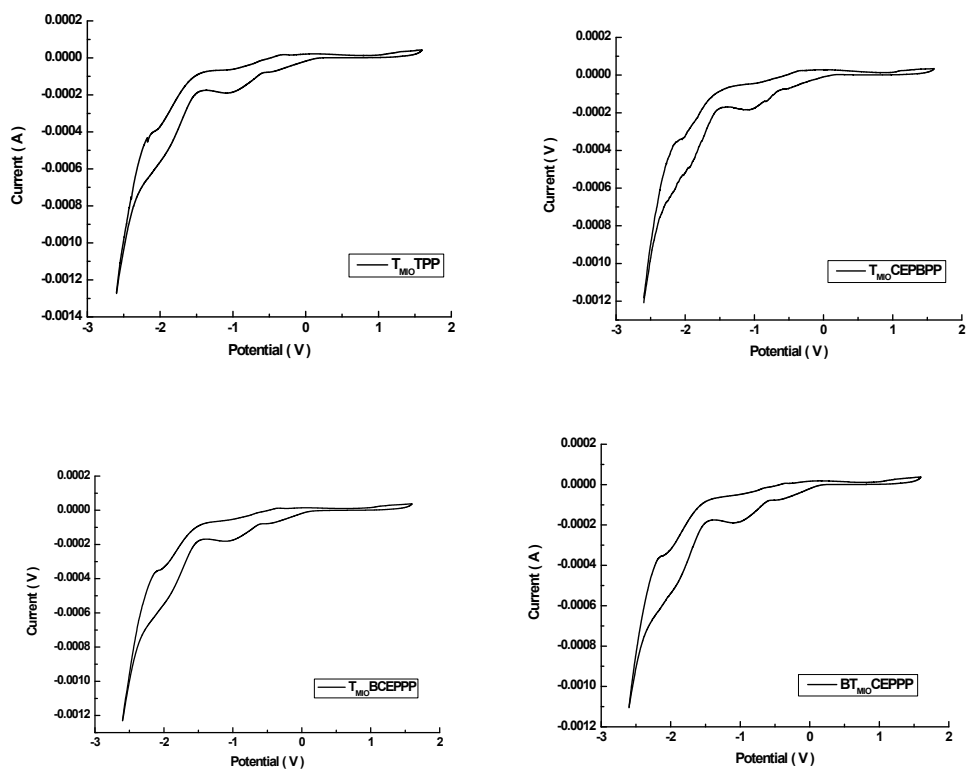

**Fig.** Current-potential curves of isoindoline nitroxide-labeled porphyrins  $T_{MIO}TPP$ ,  $T_{MIO}CEPBPP$ ,  $T_{MIO}BCEPPP$ ,  $BT_{MIO}CEPPP$  and CTMIO solutions.

**EPR spectroscopy:**

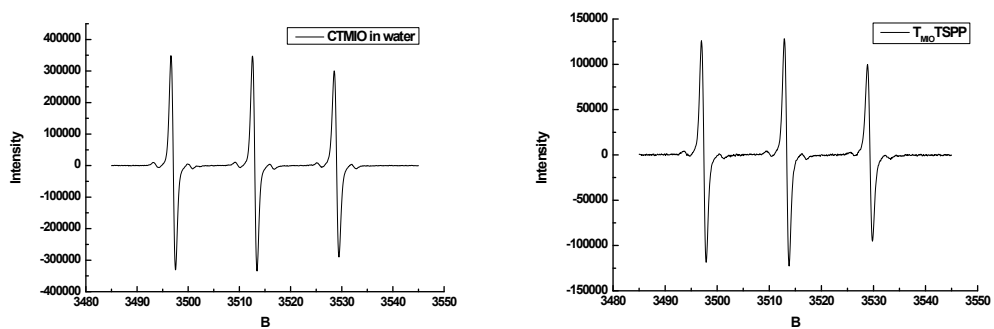

**Fig.** EPR spectra of isoindoline nitroxide-labeled porphyrin  $T_{MIO}TSPP$  and CTMIO in distilled water at room temperature.
